# Supplementary material for: A multi-purpose, multi-rotor drone system for long range andhigh-altitude volcanic gas plume measurements
Source: Copernicus journal article supplement (doi:10.5194/amt-2020-452), 2020-12-14
Supplement: Supplementary file [file amt-2020-452-AC2-supplement.pdf]

# A multi-purpose, multi-rotor drone system for long range and high-altitude volcanic gas plume measurements

Bo Galle<sup>1</sup>, Santiago Arellano<sup>1\*</sup>, Nicole Bobrowski<sup>2,3</sup>, Vladimir Conde<sup>1</sup>, Tobias P. Fischer<sup>4</sup>, Gustav Gerdes<sup>5</sup>, Alexandra Gutmann<sup>6</sup>, Thorsten Hoffmann<sup>6</sup>, Ima Itikarai<sup>7</sup>, Tomas Krejci<sup>8</sup>, Emma J. Liu<sup>9,10</sup>, Kila Mulina<sup>7</sup>, Scott Nowicki<sup>4,11</sup>, Tom Richardson<sup>12</sup>, Julian Rüdiger<sup>6</sup>, Kieran Wood<sup>12</sup>, Jiazhi Xu<sup>1</sup>

<sup>1</sup>Department of Earth, Space and Environment, Chalmers University of Technology, SE 41296, Gothenburg, Sweden

<sup>2</sup>Institute for Environmental Physics, University of Heidelberg, D-69120 Heidelberg, Germany

<sup>3</sup>Max-Planck Institute for Chemistry, 55128, Mainz, Germany

<sup>4</sup>Department of Earth and Planetary Sciences, University of New Mexico, 87131, Albuquerque, NM, United States

<sup>5</sup>GerdesSolutions AB, 128 41, Stockholm, Sweden

<sup>6</sup>Department of Chemistry, Johannes Gutenberg-University, 55099, Mainz, Germany

<sup>7</sup>Rabaul Volcano Observatory, P.O. Box 386, Rabaul, Papua New Guinea

<sup>8</sup>HAB Electronic AB, 34140, Ljungby, Sweden

<sup>9</sup>Department of Earth Sciences, University of Cambridge, CB2 3EQ, Cambridge, United Kingdom

<sup>10</sup>Department of Earth Sciences, WC1E 6BS, University College London, London, United Kingdom

<sup>11</sup>Quantum Spatial, Inc. Albuquerque, NM, United States

<sup>12</sup>Department of Aerospace Engineering, University of Bristol, BS8 1TR, Bristol, United Kingdom

*Correspondence to:* Santiago Arellano (santiago.arellano@chalmers.se)

## Supplement

### S1. Data files

The Excel-book file amt-2020-452-raw\_data contains all data used for the figures presented in this article. Each sheet is named according to the figures in which data was used and the instrument from which data was obtained, e.g. data\_fig11&14\_MultiGAS for the data used for figures 11 and 14 using the MultiGAS (Chalmers) instrument.

Most sheets contain the full dataset coming from the instrument, not all parameters are needed for the data presented in the figures of the article. Data that was used for the figures are marked with an orange/pink background.

The following descriptions correspond to the columns on each data-sheet:

#### **data\_Fig1\_UAV**

Data file extracted from a “ulog” file containing a series of parameters from the multi-rotor navigation sensors. The plotted columns contain:

Time stamp in  $\mu\text{s}$

Roll angle

Pitch angle

Yaw angle

Thrust factor

Latitude UTM

Longitude UTM

x-distance from reference position

y-distance from reference position

z-distance from reference position (inverse of altitude)

**data\_fig5\_Sunkist:**

Data file as recorded by the Sunkist instrument. It contains:

Date UTC

Time UTC

CO<sub>2</sub> data at instrument resolution (calibration from U. Mainz) in ppm

SO<sub>2</sub> data at instrument resolution (calibration from U. Mainz) in ppm

Temperature in °C

Pressure in Pa

Relative humidity in %

**data\_fig8\_MultiGAS, data\_fig12&15\_MultiGAS, and data\_figS1\_MultiGAS**

Data files as recorded by the MultiGAS instrument, stored in internal memory, and sent to ground-station in real-time. It contains:

Time UTC

Date UTC

Lat UTM

Lon UTM

Temperature in °C

Pressure in Pa

Relative humidity in %

Altitude in m ASL

SO<sub>2</sub> signal (uncalibrated) from working electrode in ppb

H<sub>2</sub>S signal (uncalibrated) from working electrode in ppb

NO signal (uncalibrated) from working electrode in ppb

NO<sub>2</sub> signal (uncalibrated) from working electrode in ppb

NO<sub>2</sub> signal (uncalibrated) from auxiliary electrode in ppb

H<sub>2</sub>S signal (uncalibrated) from auxiliary electrode in ppb

NO signal (uncalibrated) from auxiliary electrode in ppb

SO<sub>2</sub> signal (uncalibrated) from auxiliary electrode in ppb

CO<sub>2</sub> signal (uncalibrated) from auxiliary electrode in ppm

x-tilt angle in deg

y-tilt angle in deg  
z-tilt angle in deg  
Wind speed from anemometer in m/s  
Wind direction from anemometer in deg  
Activation of pump for bag sampling (0/1)

#### **data\_fig9\_UAV**

Data file extracted from a “u-log” file containing a series of parameters from the multi-rotor navigation sensors. The plotted columns contain:

Time stamp in  $\mu$ s  
Horizontal wind speed, calculated from components x and y of wind speed, in m/s

#### **data\_fig10\_WindSpeed**

Time series of wind speed obtained from three different methods: (i) modeled data from ECMWF ERA5 Re-analysis database (C3S, 2017) retrieved at hourly resolution,  $0.25 \times 0.25$  deg horizontal resolution, and 16 pressure-levels from ground to about 10 km ASL. This data is then interpolated at the location of the summit of Manam. (ii) Wind data measured by the drone using anemometer and drift-method. (iii) Wind data measured from ground using the dual-beam method described in Johansson et al. (2009). The columns contain:

Date UTC  
Time UTC  
Horizontal component of wind speed in m/s

#### **data\_fig11&15\_MobileDOAS**

Data file produced from an evaluation with the MobileDOAS software (Johansson et al., 2010) of data collected by the instrument during a traverse with the drone. It contains

Time UTC  
Latitude UTM  
Longitude UTM  
Altitude m ASL  
SO<sub>2</sub> vertical column density in ppm\*m

#### **data\_fig13\_MultiGAS**

Data from MultiGAS instrument after calibration and other corrections. It contains

SO<sub>2</sub> volume mixing ratio in plume in ppm  
CO<sub>2</sub> volume mixing ratio in plume in ppm

## S2. Proof of concept of MultiGAS measurement with stabilized sample taken by the drone

A sample of the plume was taken by filling a Tedlar bag through remote activation of a pump when a signal of SO<sub>2</sub> was detected and then connected in closed loop to the MultiGAS sensor for several minutes after landing. This sampling method was applied several times during the field campaign in Manam in May 2019, but all samples with concentration of SO<sub>2</sub> higher than 10 ppm were used for attempting measurements of the isotopic composition of carbon.

The results of the ‘practice’ measurement are shown in Figure S1.

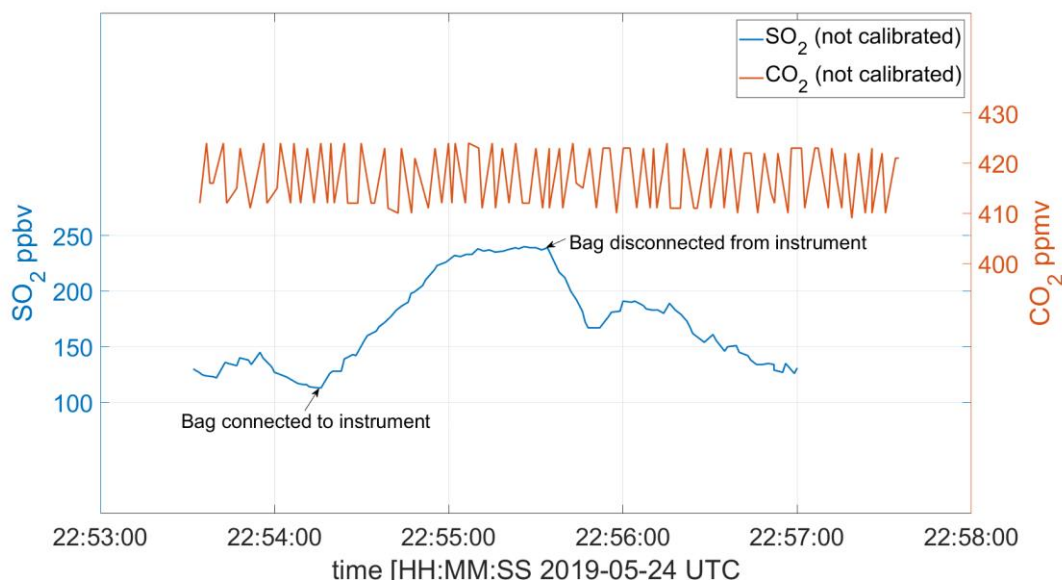

**Figure S1. Time series of uncalibrated signals observed in the field on 22 May 2019 after connecting a Tedlar bag filled by remote activation of a pump onboard the drone to the MultiGAS instrument in closed-loop**

As clearly shown, the SO<sub>2</sub> signal is detectable and its curve of growth stabilized in about 30 s ( $t_{90}$ ), which matches well with the manufacturer’s specifications. But the signal, after calibration, is less than 1 ppm and therefore the CO<sub>2</sub> signal above background is below the detection limit of the instrument (remember the molar ratio for both species at Manam was found to be  $\sim 1$ ).

The figure also shows a noise picked up by the CO<sub>2</sub> sensor, which we attribute to the radio. This signal is subtracted together with the background as part of the corrections.

## S3. Calibration tests of MultiGAS CO<sub>2</sub> and SO<sub>2</sub> sensors

Calibration tests were performed to characterize the responses of the CO<sub>2</sub> and SO<sub>2</sub> sensors for the MultiGAS instrument (Xu, 2019). We used a mixture of CO<sub>2</sub> and SO<sub>2</sub> at nominal concentrations of  $4.293 \pm 0.086\%$  (mol) and  $203.9 \pm 4.1$  ppm (mol), respectively (i.e. in a ratio of 210.5:1), and mix it with pure N<sub>2</sub> to prepare diluted mixtures at 0, 0.5, 1, 2, and 4 ppm SO<sub>2</sub>. The mixture was controlled by a dynamic gas calibrator (Thermo Scientific, model 146i) with a flow rate of 5 l/min. The mixture was pumped into the inlet of the MultiGAS at a constant flow rate of 0.5 l/min and ambient temperature (27.8°C) and pressure (102 kPa). Besides the MultiGAS system used in Manam (referred as “flow through” in the figures below, due to the use of an active pump), another system with the sensors exposed passively to the gas (“diffusion”) was tested, and they were compared to a reference system using a more precise instrument based on a LI-COR 7200 sensor, which has a time response  $t_{90}$  of 0.1 s and 0.3 ppm precision (“sniffer”). Each mixture was measured for periods of about 30 minutes until the gas calibrator was stabilized. The results of the measurements are shown in Figure S2.

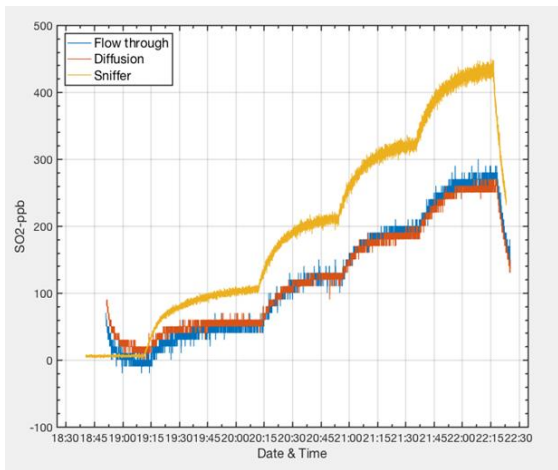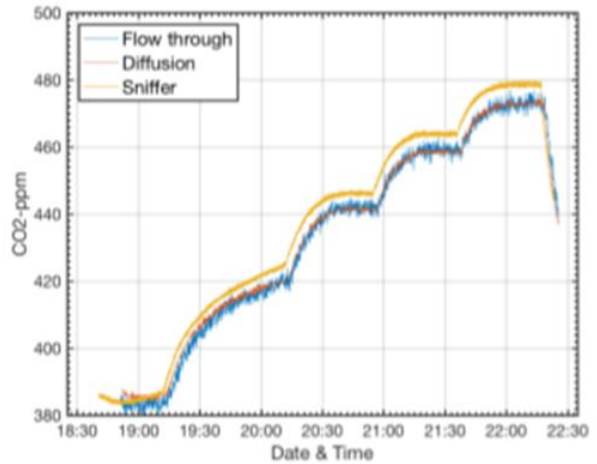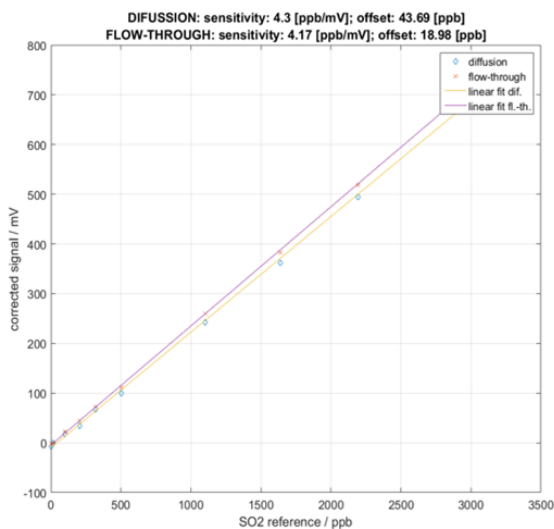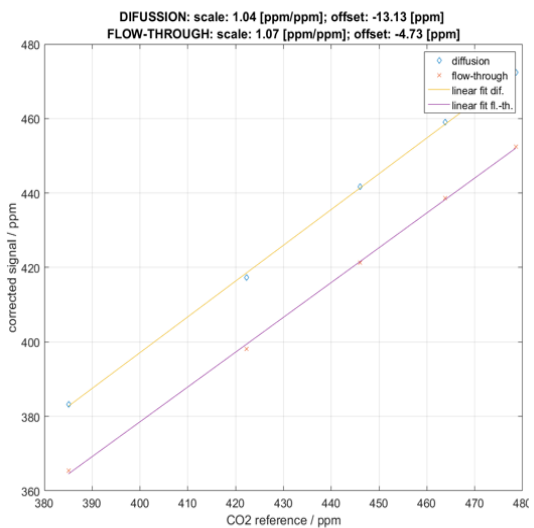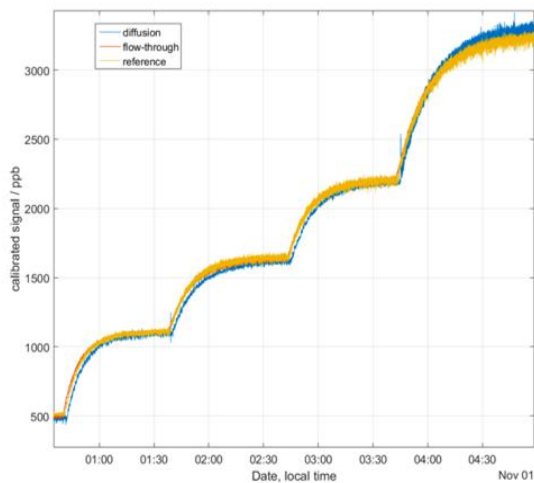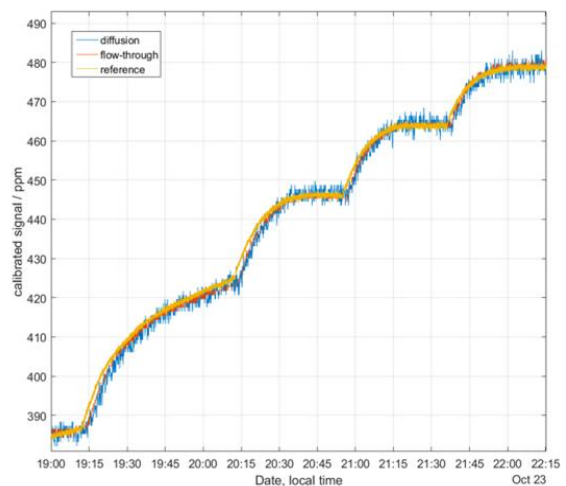

**Figure S2. Calibration measurements for the MultiGAS instrument used in Manam (flow-through), in comparison with two another model of MultiGAS with sensors directly exposed to the gas without a pump (diffusion) and with a reference instrument based on a LI-COR 7200 sensor. The instruments were exposed to known concentrations of gas from which the calibration constants (offset and sensitivity) were derived. The upper panels show the measured signals using the calibration constants from the manufacturer, the middle panels show the calibration curves to derive the effective constants and the lower panels showed the calibrated signals. The flow-through instrument showed much lower noise and it was chosen for the measurements at Manam (figures from Xu, 2019).**

Additionally, an experiment was designed to characterize the time response of the sensors. For this, the instruments were placed inside a box with a stable mixture of CO<sub>2</sub> and SO<sub>2</sub> and then the instruments were suddenly removed out of the box to be exposed to ambient concentrations of these gases. This sudden change in concentration mimics a step calibration function. From the decay in signal it was possible to estimate the response times at 90% level ( $t_{90}$ ) of the sensors. The experiment was repeated two times and responses times of 20-25 s and 20 s were found for the MultiGAS (flow-through) SO<sub>2</sub> and CO<sub>2</sub> sensors, respectively. The results are shown in Figure S3.

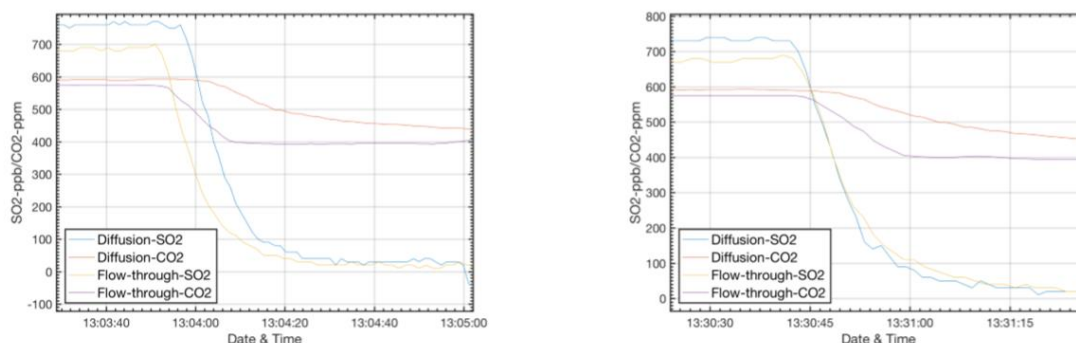

(a) First time.

(b) Second time.

**Figure S3. Response-time experiments showing the decay in signal when the sensors of the MultiGAS instruments (diffusion and flow-through) were exposed to a stable concentration of SO<sub>2</sub> and SO<sub>2</sub> and then removed suddenly to ambient concentration. Notice the quicker response of the system using a pump (flow-through, used in Manam) and the stabilization after response times of 20-25 s for SO<sub>2</sub> and 20 s for CO<sub>2</sub>.**

## References

Copernicus Climate Change Service (C3S) (2017): ERA5: Fifth generation of ECMWF atmospheric reanalyses of the global climate. Copernicus Climate Change Service Climate Data Store (CDS), accessed in May 2019. <https://cds.climate.copernicus.eu/cdsapp#!/home>

Johansson, M., Galle, B., Zhang, Y. *et al.* The dual-beam mini-DOAS technique—measurements of volcanic gas emission, plume height and plume speed with a single instrument. *Bull Volcanol* **71**, 747–751 (2009). <https://doi.org/10.1007/s00445-008-0260-8>

Johansson, M., MobileDOAS software, Chalmers University of Technology, 2010.

Xu, J., Development of A Drone Concept for Volcanic Gas Measurements, MSc. Thesis, Chalmers University of Technology, 2019.
